# Supplementary material
Source: PubMed Central journal article supplement (PMC4216254)

## Appendix 2: Clinical practice guidelines selection

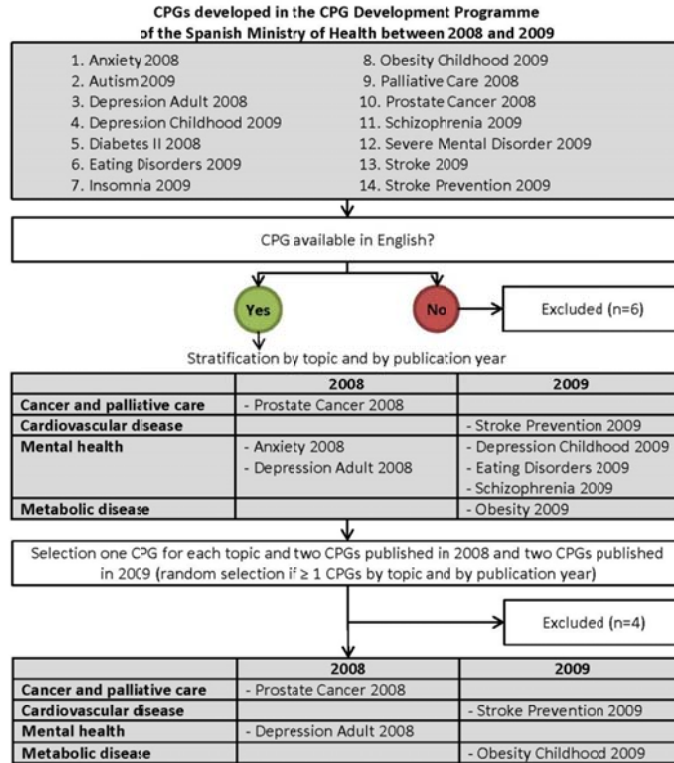

Supplement: supp_140547_validity-alonso-2-at.pdf [file supp_140547_validity-alonso-2-at.pdf]
